# Supplementary material for: Study on 3D printed MXene-berberine-integrated scaffold for photo-activated antibacterial activity and bone regeneration
Source: Royal Society of Chemistry journal article supplement (doi:10.1039/d3tb02306k), 2024-01-01
Supplement: d3tb02306k1.pdf [file d3tb02306k1.pdf]

1 Supplementary information

2 **Study of 3D Printed MXene-Berberine-Integrated Scaffold for**

3 **Photo-Activated Antibacterial Property and Bone Regeneration**

4 Yi Tan <sup>a</sup>, Huan Sun <sup>b</sup>, Yuanchen Lan <sup>c</sup>, Haider Mohammed Khan <sup>d</sup>, Hui Zhang <sup>c</sup>, Linli  
5 Zhang <sup>c</sup>, Fengying Zhang <sup>c</sup>, Yujia Cui <sup>f</sup>, Lan Zhang <sup>a</sup>, Dingming Huang <sup>a</sup>, Xinmei Chen  
6 <sup>a</sup>, Changchun Zhou <sup>b</sup>, Jianxun Sun <sup>\*a</sup> and Xuedong Zhou <sup>a</sup>

7

8 <sup>a</sup> *State Key Laboratory of Oral disease & National Center for Stomatology & National*  
9 *Clinical Center for Oral Diseases & Department of Cariology and Endodontics, West*  
10 *China Hospital of Stomatology, Sichuan University, Chengdu 610041, Sichuan, China*

11 <sup>b</sup> *National Engineering Research Centre for Biomaterials, College of Biomedical*  
12 *Engineering, Sichuan University, Chengdu 610041, China*

13 <sup>c</sup> *State Key Laboratory of Oral disease & National Center for Stomatology & National*  
14 *Clinical Center for Oral Diseases & Department of Orthodontics, West China Hospital*  
15 *of Stomatology, Sichuan University, Chengdu 610041, Sichuan, China*

16 <sup>d</sup> *Department of Orthopedics, West China Hospital, Sichuan University, Chengdu*  
17 *610041, China*

18 <sup>e</sup> *West China Hospital/West China School of Nursing, Sichuan University, Chengdu*  
19 *610041, China*

20 <sup>f</sup> *State Key Laboratory of Oral disease & National Center for Stomatology & National*  
21 *Clinical Center for Oral Diseases & Department of Paediatric Dentistry, West China*  
22 *Hospital of Stomatology, Sichuan University, Chengdu 610041, Sichuan, China*

23

24 \* Corresponding authors at: *State Key Laboratory of Oral disease & National Center*  
25 *for Stomatology & National Clinical Center for Oral Diseases & Department of*  
26 *Cariology and Endodontics, West China Hospital of Stomatology, Sichuan University,*  
27 *Chengdu 610041, Sichuan, China. E-mail: [jxsun@scu.edu.cn](mailto:jxsun@scu.edu.cn)*

28

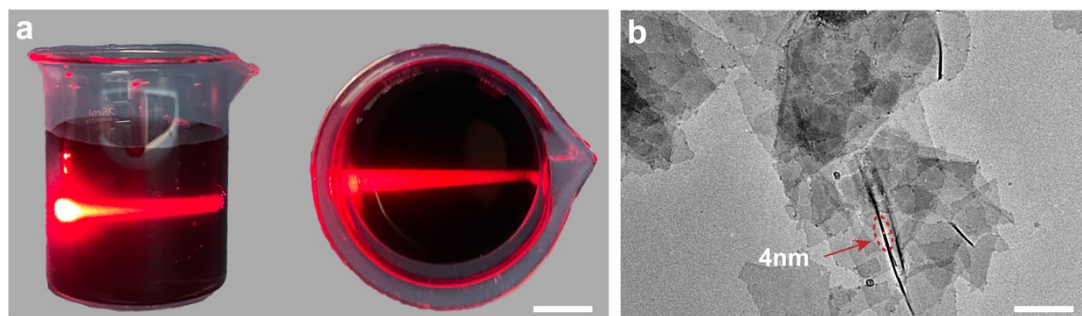

29  
 30 **Fig. S1** (a) Digital photographs of Tyndall effect in  $Ti_3C_2$  aqueous solution (scale bar:  
 31 20 mm). (b) TEM image of  $Ti_3C_2$  nanosheets (scale bar: 200 nm).  
 32

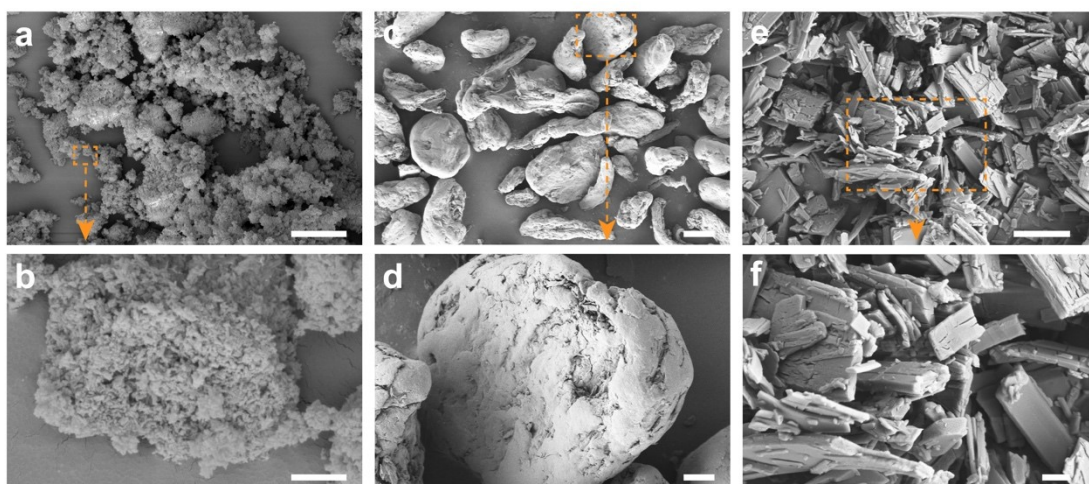

33  
 34 **Fig. S2** (a) SEM image of BCP (scale bar: 10  $\mu m$ ). (b) Magnified SEM image of BCP  
 35 (scale bar: 1  $\mu m$ ). (c) SEM image of SA (scale bar: 100  $\mu m$ ). (d) Magnified SEM image  
 36 of SA (scale bar: 20  $\mu m$ ). (e) SEM image of BBR (scale bar: 10  $\mu m$ ). (f) Magnified  
 37 SEM image of BBR (scale bar: 2  $\mu m$ ).  
 38

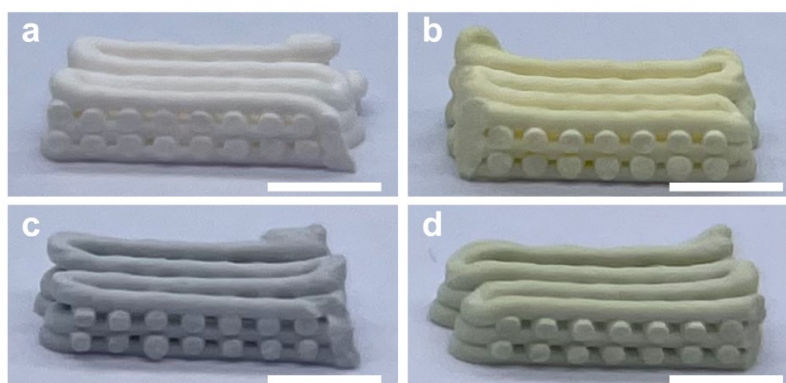

39  
 40 **Fig. S3** Digital photographs of the cross sections of (a) BS, (b) BBS, (c) BTS, and (d)  
 41 BBTS (scale bars: 3 mm).  
 42

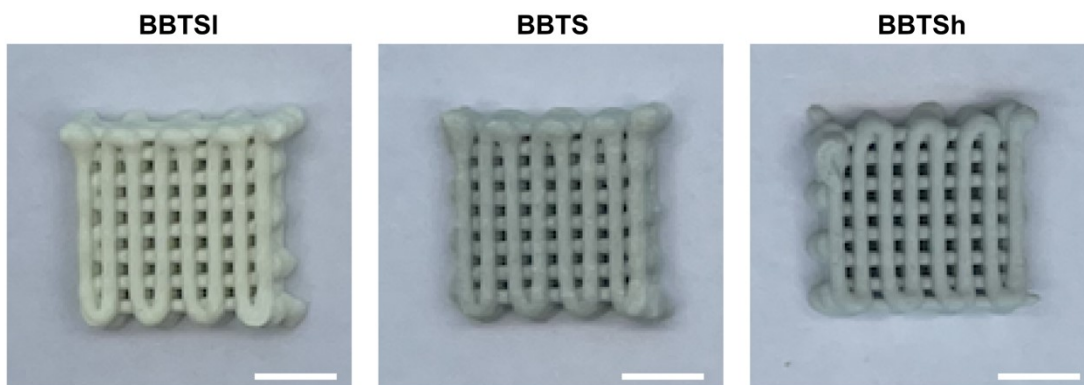

43

44 **Fig. S4** Digital photographs of composite scaffolds with different content ratios of  
 45  $\text{Ti}_3\text{C}_2$  (scale bars: 3 mm).

46

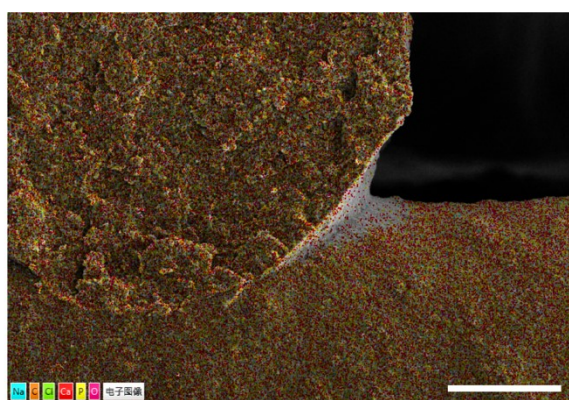

47

48 **Fig. S5** Element mappings of the cross section of BS (scale bar: 100  $\mu\text{m}$ ).

49

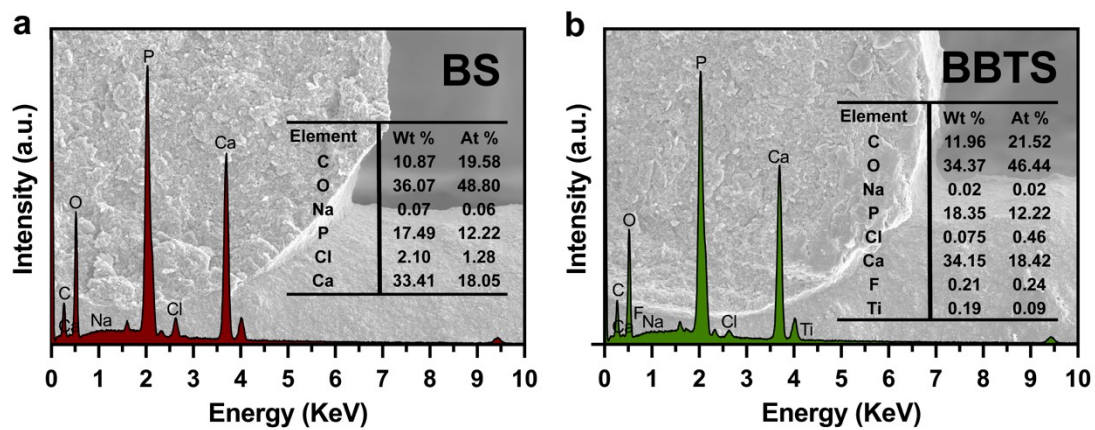

50

51 **Fig. S6** EDS (inset image) of (a) BS, and (b) BBTS.

52

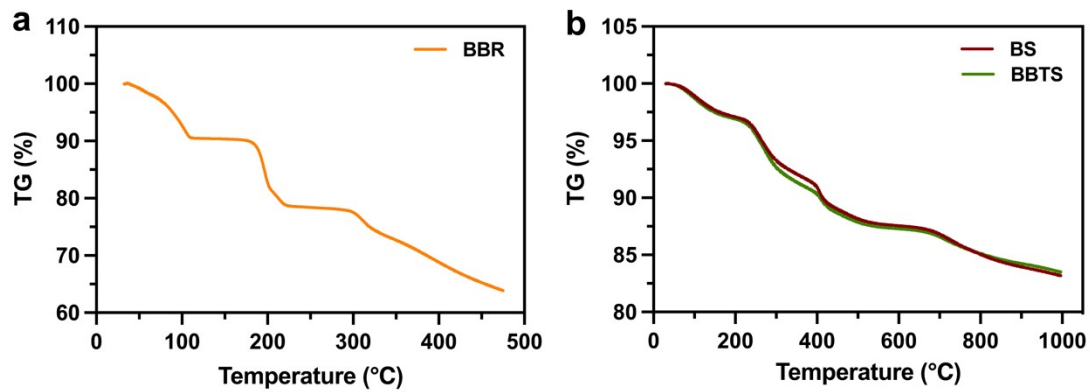

53

54 **Fig. S7** TGA results of (a) BBR, and (b) BS and BBTS.

55

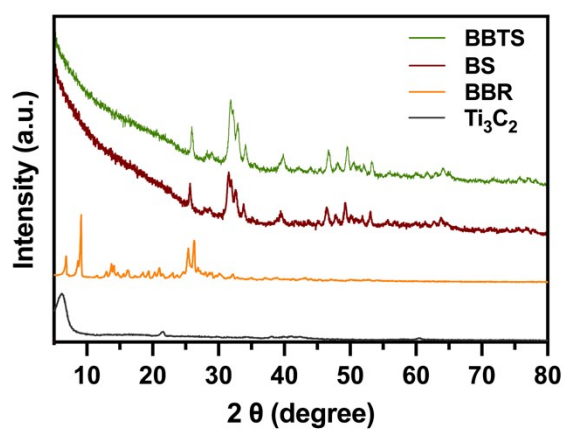

56

57 **Fig. S8** XRD patterns of Ti<sub>3</sub>C<sub>2</sub>, BBR, BS, and BBTS.

58

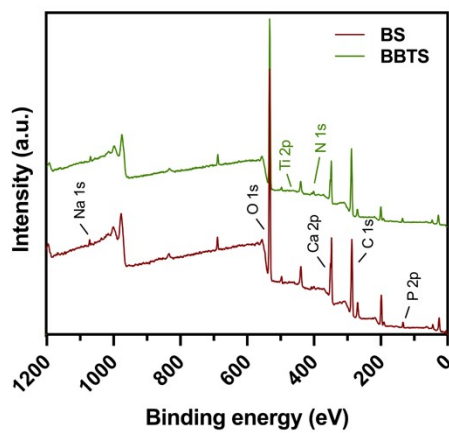

59

60 **Fig. S9** XPS spectra of BS and BBTS.

61



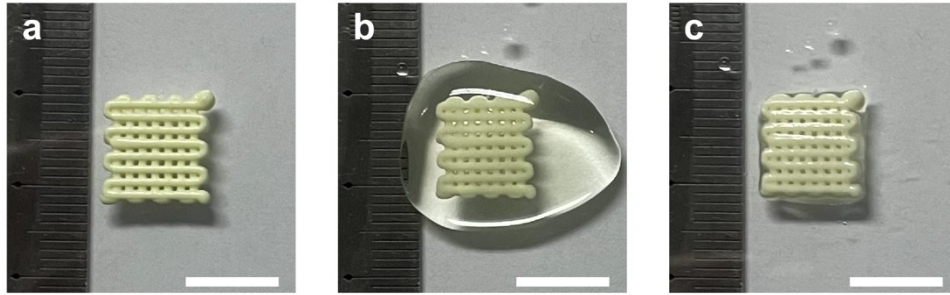

62

63 **Fig. S10** Digital photographs of the composite scaffold (a) before crosslinking, (b)  
 64 during crosslinking, and (c) after crosslinking for 10 min (scale bars: 1 cm).

65

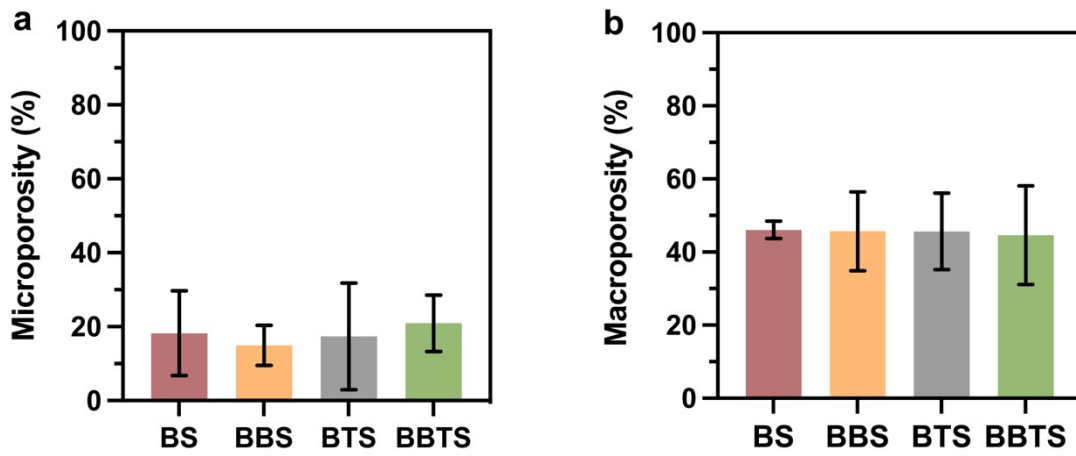

66

67 **Fig. S11** (a) Microporosities of different scaffolds. (b) Macroporosities of different  
 68 scaffolds.

69

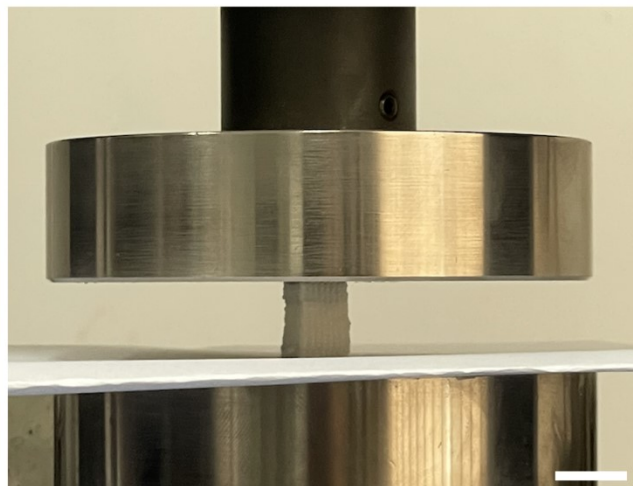

70

71 **Fig. S12** Mechanical properties analysis of the integral scaffold (scale bar: 10 mm).

72

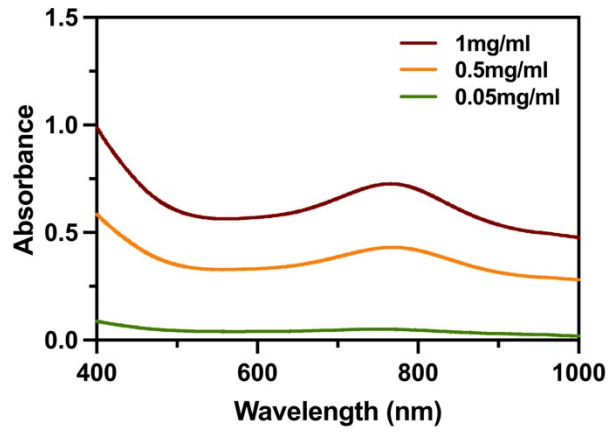

73

74 **Fig. S13** UV-vis-NIR absorption spectra of  $Ti_3C_2$  aqueous solution at different  
75 concentrations.

76

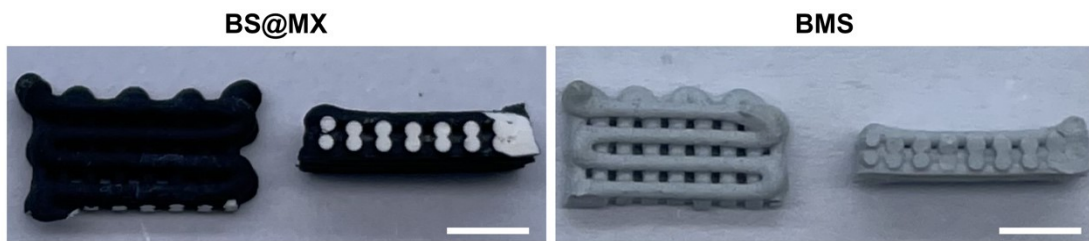

77

78 **Fig. S14** Digital photographs of BS@MX and BMS (scale bars: 3 mm).

79

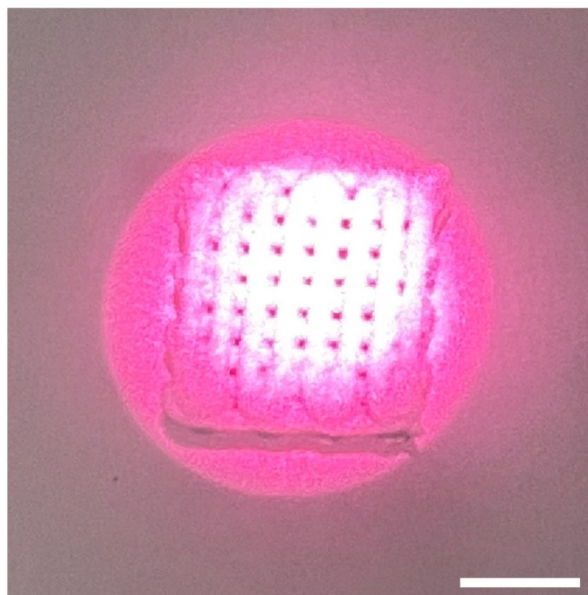

80

81 **Fig. S15** Digital photograph of the scaffold under 808 nm laser irradiation (scale bar:  
82 3mm).

83

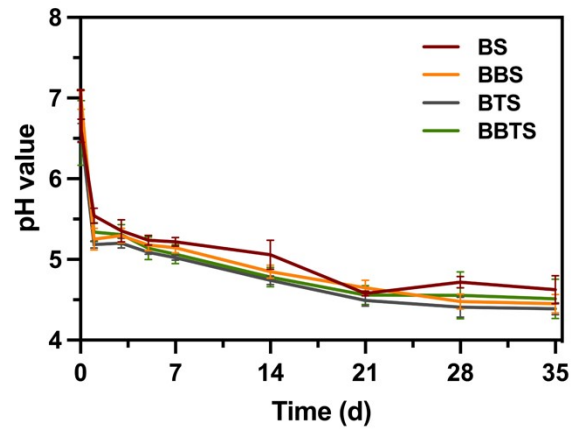

84

85 **Fig. S16** pH changes in PBS incubating different scaffolds.

86

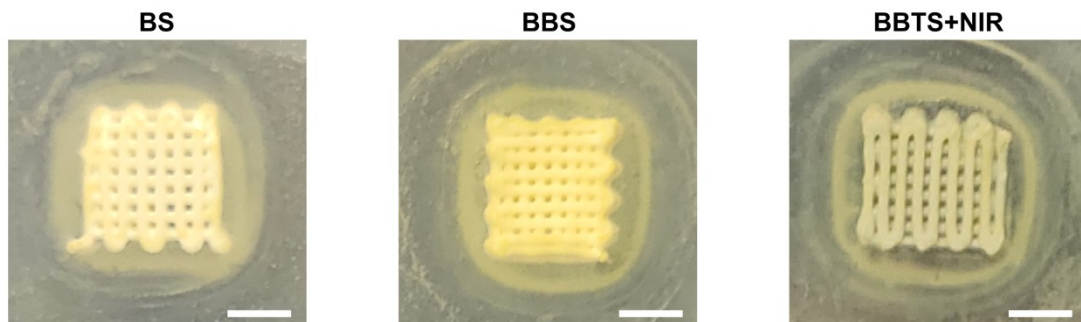

87

88 **Fig. S17** Inhibition zones (*S. aureus*) after different treatments (scale bars: 3 mm).

89

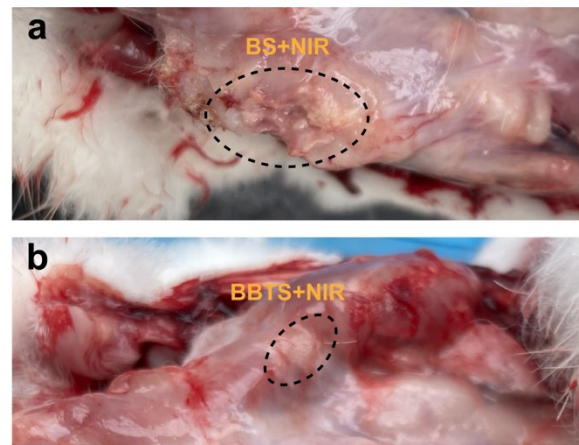

90

91 **Fig. S18** Digital photographs of the infections on the implanted sites. (a) BS+NIR. (b)

92 BBTS+NIR

93

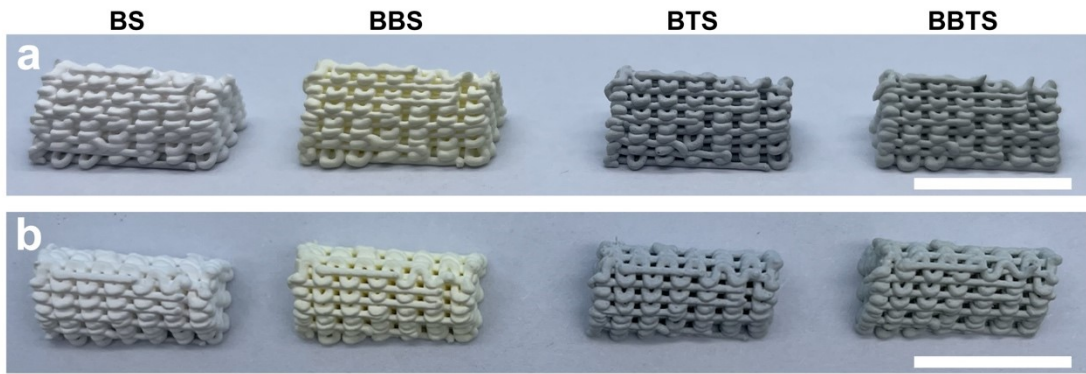

94  
 95 **Fig. S19** Digital photographs of composite scaffolds designed for the mandibular defect  
 96 (a) Anterior aspect. (b) Superior aspect (scale bars: 1 cm).  
 97

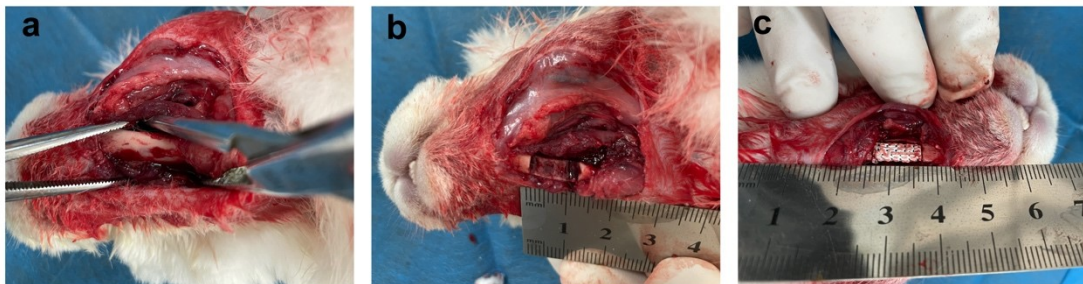

98  
 99 **Fig. S20** Digital photographs of the animal surgical procedures. (a) The mandible of  
 100 the rabbit. (b) The mandibular defect. (c) The implantation of the composite scaffold in  
 101 the defective area.
